# Supplementary material for: Multiphase PCL semi-interpenetrating networks exhibiting the triple- and stress-free two-way shape memory effect
Source: Royal Society of Chemistry journal article supplement (doi:10.1039/d2py01607a), 2023-01-01
Supplement: d2py01607a1.pdf [file d2py01607a1.pdf]

# Multiphase PCL semi-interpenetrating networks exhibiting triple- and stress-free two-way shape memory effect

*Koichiro Uto,<sup>a\*</sup> Yoshitaka Matsushita<sup>b</sup> and Mitsuhiro Ebara<sup>a</sup>*

<sup>a</sup> Research Center for Functional Materials, National Institute for Materials Science (NIMS),  
1-1 Namiki, Tsukuba, Ibaraki 305-0044, Japan

<sup>b</sup> Research Network and Facility Services Division, National Institute for Materials Science  
(NIMS), 1-2-1 Sengen, Tsukuba, Ibaraki 305-0047, Japan

\* E-mail: UTO.Koichiro@nims.go.jp

## Table of contents:

**Fig. S1** Representative <sup>1</sup>H-NMR spectra of 4b10PCL and 2b20PCL.

**Fig. S2** Representative <sup>1</sup>H-NMR spectra of 4b10 PCL and 2b20PCL macromonomers.

**Fig. S3** Swelling rate  $d/d_0$  and gel fraction  $G$  (%) of cross-linked 4b10/2b20 PCL and PCL semi-IPNs with molecular weights of 10k, 45k and 80k linear PCL at 9wt%, 23wt% and 33wt% content after 72 hours of DMF immersion.

**Table S1.** Molecular weights, polydispersity indexes and degree of acrylation of 4b10PCL and 2b20PCL macromonomers.

**Fig. S4** Representative heating curves of PCL semi-IPNs with (a) 10k, (b) 45k, and (c) 80k of linear PCL.

**Fig. S5** Triple-SME of cross-linked 4b10/2b20PCL without containing linear PCLs.

Quantitative thermal mechanical cycle test for (a) TSCP-I and (b) TSCP-II.

**Fig. S6** Cyclic test for triple-SME of PCL semi-IPNs consisting of 23wt% linear PCLs with molecular weights of 80k. Quantitative thermal mechanical cycle test for (a) TSCP-I and (b) TSCP-II.

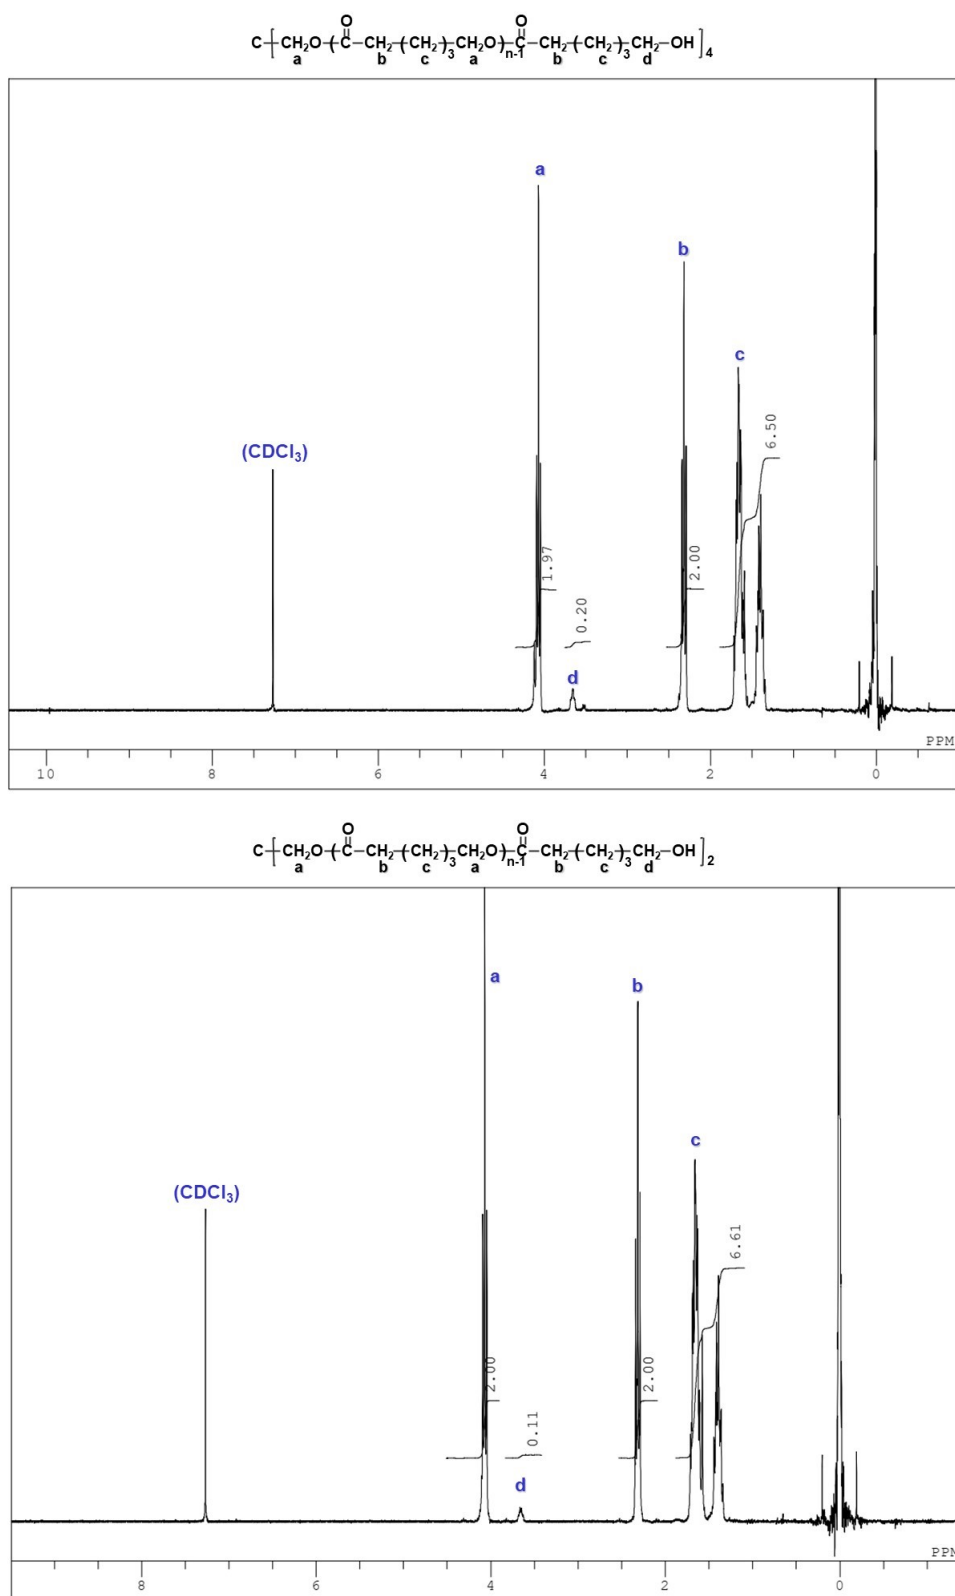

**Fig. S1** Representative  $^1\text{H}$ -NMR spectra of 4b10 PCL (top) and 2b20PCL (bottom).

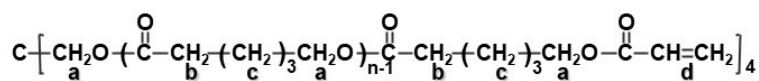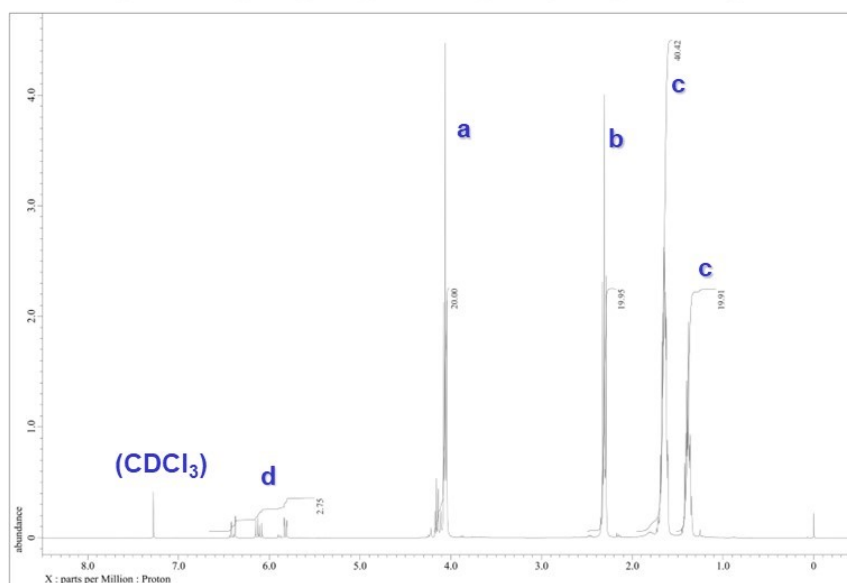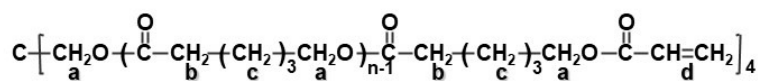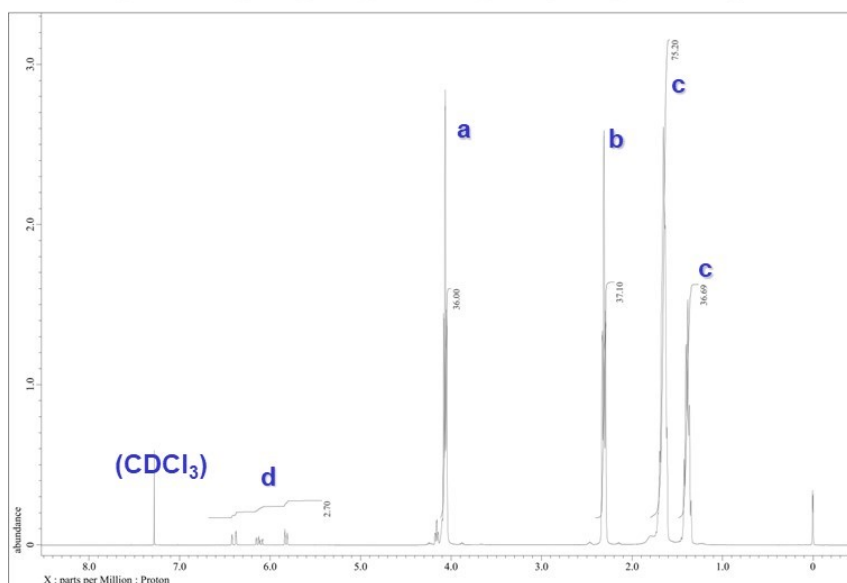

**Fig. S2** Representative <sup>1</sup>H-NMR spectra of 4b10 PCL macromonomer.

**Table S1.** Molecular weights, polydispersity indexes and degree of acrylation of 4b10PCL and 2b20PCL macromonomers.

| Polymer type   | Mn (Da) <sup>1)</sup> | Mn (Da) <sup>2)</sup> | Mw (Da) <sup>2)</sup> | PDI <sup>2)</sup> | D.A. (%) <sup>1)</sup> |
|----------------|-----------------------|-----------------------|-----------------------|-------------------|------------------------|
| 4b10 PCL-macro | 4700                  | 4200                  | 4600                  | 1.1               | 92                     |
| 2b20 PCL-macro | 4250                  | 4500                  | 5400                  | 1.2               | 90                     |

D.A.: Degree of acrylation (End group introduction rate)

1) Calculated by <sup>1</sup>H NMR; solvent: CDCl<sub>3</sub>

2) Measured by GPC. Solvent: DMF. Standard: PS.

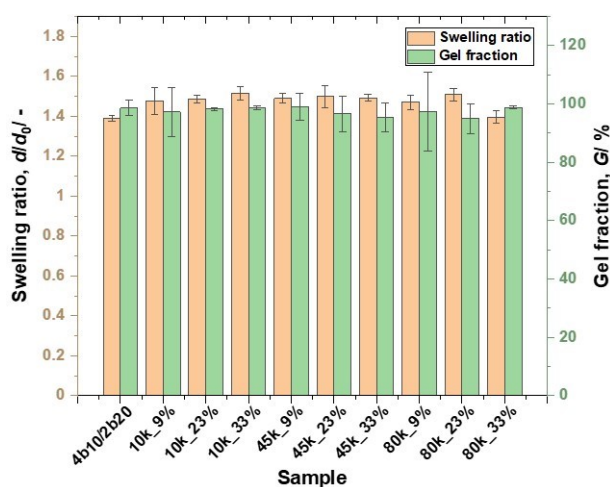

**Fig. S3** Swelling rate  $d/d_0$  and gel fraction  $G$  (%) of cross-linked 4b10/2b20 PCL and PCL semi-IPNs with molecular weights of 10k, 45k and 80k linear PCL at 9wt%, 23wt% and 33wt% content after 72 hours of DMF immersion.

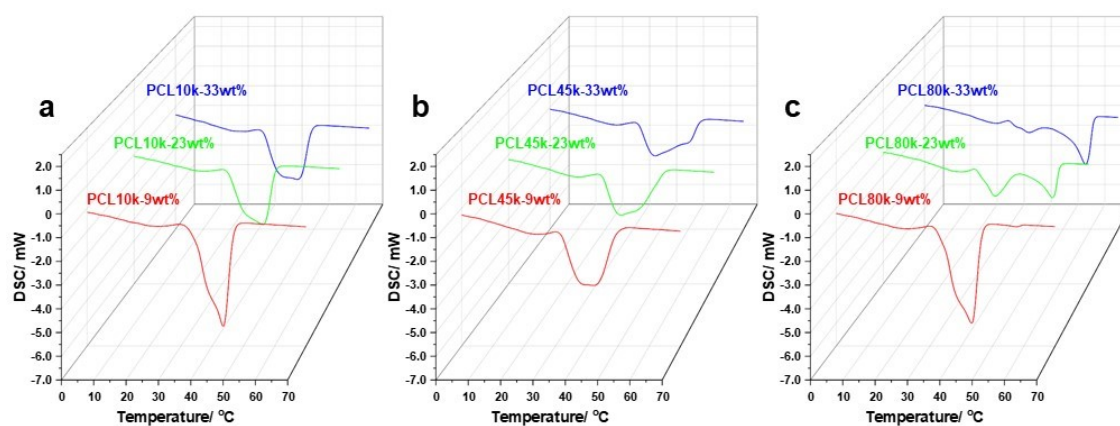

**Fig. S4** Representative heating curves of PCL semi-IPNs with (a) 10k, (b) 45k, and (c) 80k of linear PCL.

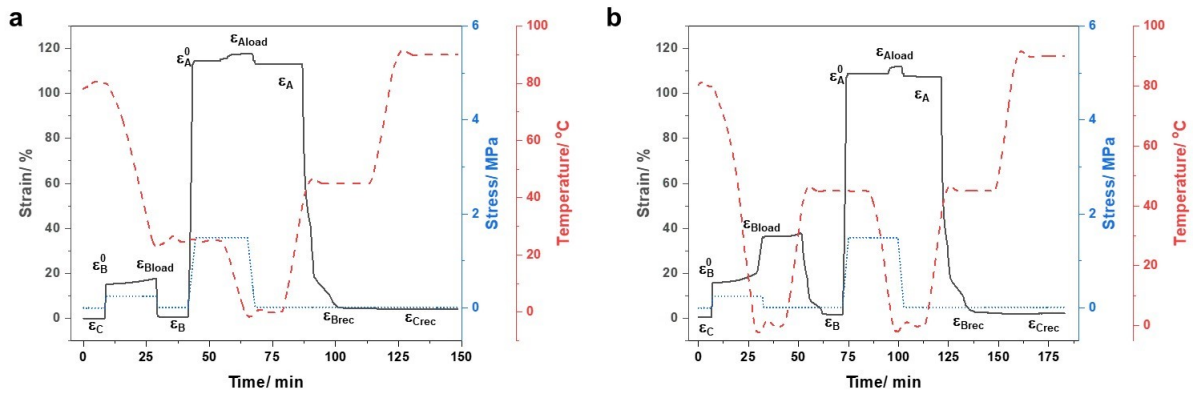

**Fig. S5** Triple-SME of cross-linked 4b10/2b20PCL without containing linear PCLs. Quantitative thermal mechanical cycle test for (a) TSCP-I and (b) TSCP-II.

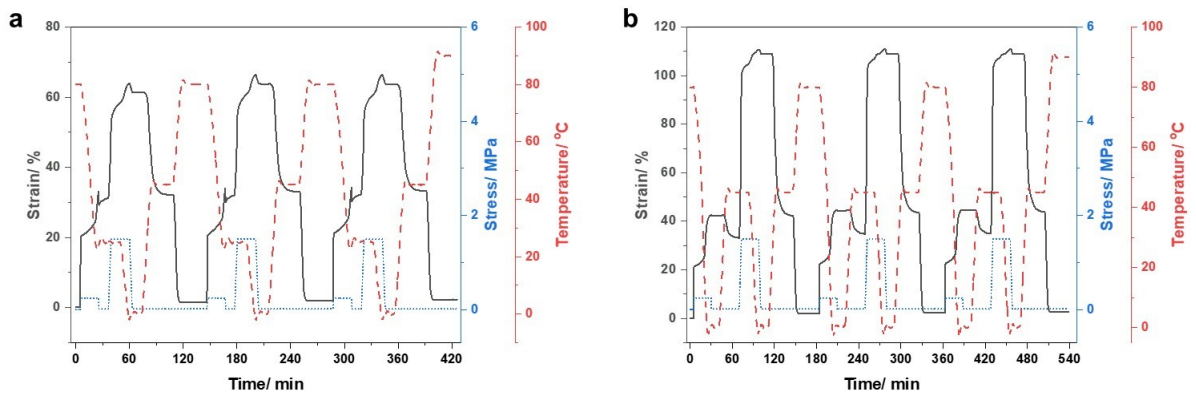

**Fig. S6** Cyclic test for triple-SME of PCL semi-IPNs consisting of 23wt% linear PCLs with molecular weights of 80k. Quantitative thermal mechanical cycle test for (a) TSCP-I and (b) TSCP-II.
